# Supplementary material for: Characterization and genetic mapping of eceriferum-ym (cer-ym), a cutin deficient barley mutant with impaired leaf water retention capacity
Source: PubMed Central journal article supplement — Breed Sci. 2015 Sep 1;65(4):327–32. doi: 10.1270/jsbbs.65.327 (PMC4542933; doi:10.1270/jsbbs.65.327), 2015-09-01
Supplement: 65_327_1.pdf [file 65_327_1.pdf]

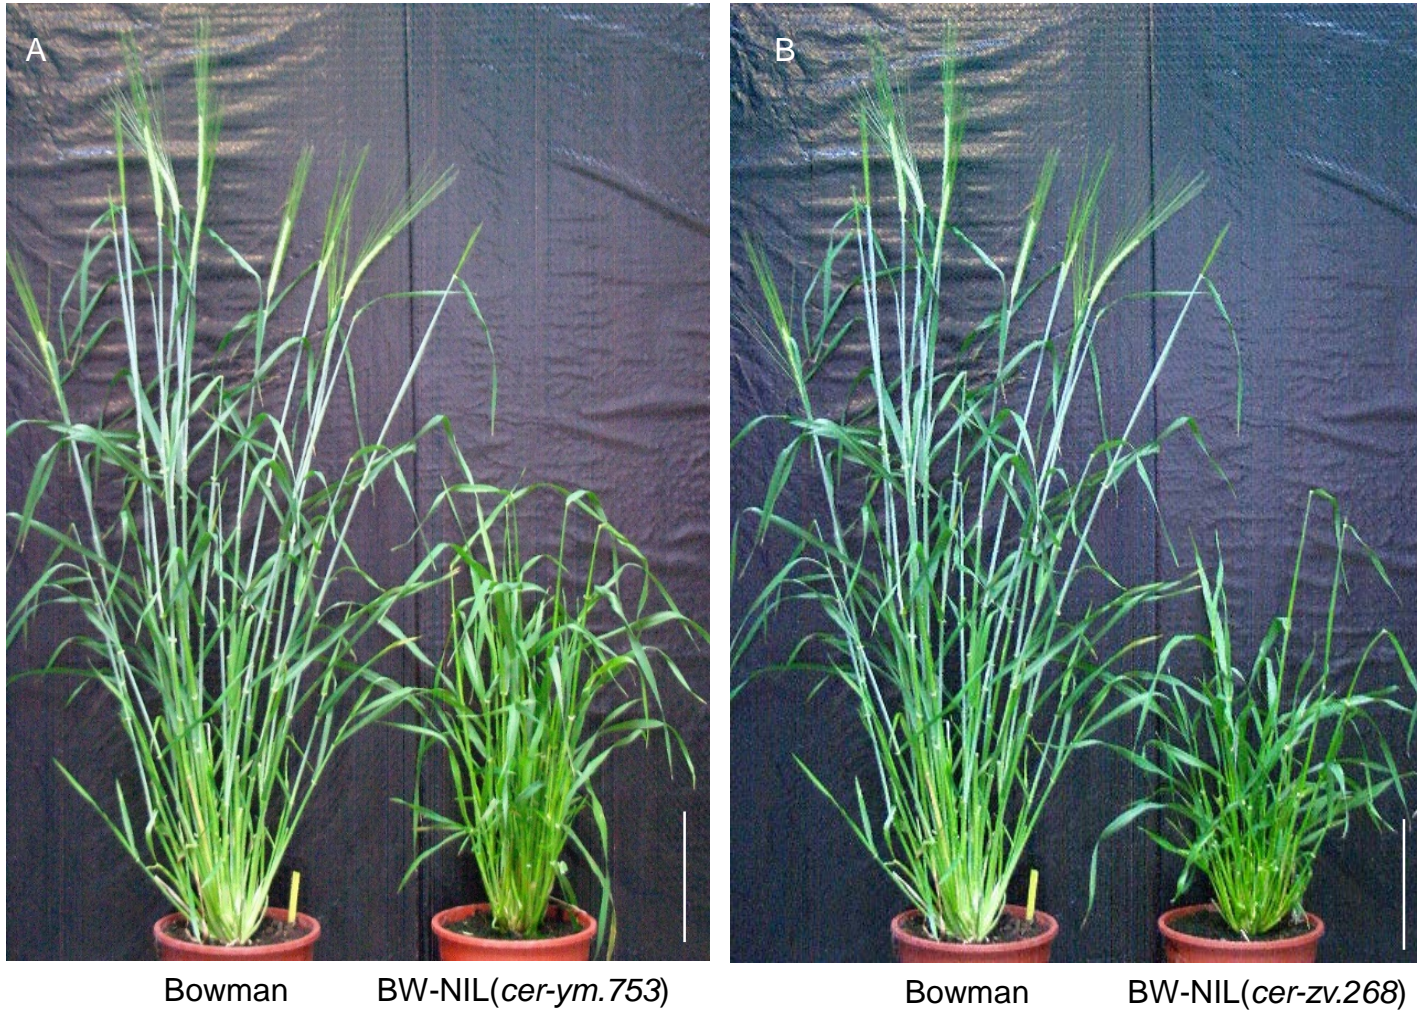

**Supplemental Fig. 1.** Contrasting morphologies of BW-NIL(*cer-ym.753*) (A) and BW-NIL(*cer-zv.268*) (B) and Bowman under green house conditions. Scale bar, 10 cm
